# Supplementary material for: Differential recombination dynamics within the MHC of macaque species
Source: PubMed Central journal article supplement (PMC4156779; doi:10.1007/s00251-014-0783-4), 2014-06-17
Supplement: 251_2014_783_MOESM3_ESM.pdf [file 251_2014_783_MOESM3_ESM.pdf]

| Supplementary Table 3. MHC founder haplotypes of Indian rhesus macaques |        |         |         |         |         |         |         |         |         |         |         |         |         |         |         |         |         |        |        |       |          |    |  |  |
|-------------------------------------------------------------------------|--------|---------|---------|---------|---------|---------|---------|---------|---------|---------|---------|---------|---------|---------|---------|---------|---------|--------|--------|-------|----------|----|--|--|
| founder                                                                 | Mamu-A | D6S2704 | D6S2702 | D6S2797 | D6S2919 | D6S2911 | Mamu-B  | D6S2809 | D6S1615 | D6S2670 | D6S2742 | D6S2893 | D6S2892 | D6S2734 | D6S2890 | D6S2888 | D6S2804 | DRB    | DQA*   | DQB*  | # haplot |    |  |  |
| C 2378                                                                  | A004   | 158     | 271     | 178     | 246     | 245     | B001a   | 138     | 117     | 181     | 201     | 215     | 205     | null    | 209     | 146     | 239     | DRB01a | 26:01  | 18:01 | 3        |    |  |  |
| X 3005                                                                  | A007   | 158     | 271     | 184     | null    | 245     | B001a   | 138     | 117     | 181     | 201     | 215     | 205     | null    | 209     | 146     | 239     | DRB01a | 26:01  | 18:01 | 3        |    |  |  |
| A Xusa                                                                  | A008   | 167     | 277     | 184     | 261     | 278     | B045a   | 134     | 122     | 189     | 201     | 215     | 205     | null    | 209     | 146     | 239     | DRB01a | 26:01  | 18:01 | 2        |    |  |  |
| B 2794                                                                  | A004   | 158     | 273     | 184     | 257     | 292     | B001a   | 138     | 122     | 172     | 203     | 199     | 216     | 211     | null    | 132     | 251     | DRB01a | 26:01  | 18:01 | 2        |    |  |  |
| C 2679                                                                  | A003   | 158     | 267     | 184     | 257     | 324     | B001a   | 153     | 120     | 197     | 201     | 215     | 214     | 202     | 209     | 146     | 239     | DRB01a | 26:02  | 18:11 | 4        |    |  |  |
| D/C 3761                                                                | A008   | 167     | 269     | 181     | 257     | 284     | B001a   | 149     | 117     | 176     | 201     | 215     | 214     | 202     | 209     | 146     | 239     | DRB01a | 26:02  | 18:11 | 3        |    |  |  |
| A 2648                                                                  | A007   | 156     | 267     | 184     | 257     | 307     | B001a   | 140     | 120     | 186     | 201     | 215     | 214     | 202     | 209     | 146     | 239     | DRB01a | 26:02  | 18:11 | 2        |    |  |  |
| C 494                                                                   | A019   | 156     | 277     | 187     | 253     | 266     | B008    | 136     | 118     | 194     | 201     | 215     | 214     | 202     | 209     | 146     | 239     | DRB01a | 26:02  | 18:11 | 3        |    |  |  |
| C/D 214P                                                                | A008   | 167     | 277     | 187     | 253     | 266     | B008    | 136     | 118     | 194     | 201     | 215     | 214     | 202     | 209     | 146     | 239     | DRB01a | 26:02  | 18:11 | 3        |    |  |  |
| C/D 99020                                                               | A012   | 158     | 275     | 187     | 253     | 266     | B008    | 136     | 118     | 194     | 201     | 215     | 214     | 202     | 209     | 146     | 239     | DRB01a | 26:02  | 18:11 | 4        |    |  |  |
| A 2794                                                                  | A022a  | 158     | 275     | 184     | 257     | 292     | B012b   | 149     | 122     | 172     | 201     | 215     | 214     | 202     | 209     | 146     | 239     | DRB01a | 26:02  | 18:11 | 1        |    |  |  |
| C 3042                                                                  | A011   | 158     | 267     | 193     | 257     | 290     | B024a   | 128     | 120     | 178     | 201     | 215     | 214     | 202     | 209     | 146     | 239     | DRB01a | 26:02  | 18:11 | 2        |    |  |  |
| D 3163                                                                  | A002a  | 160     | 271     | 178     | 247     | 282     | B024a   | 130     | 120     | 161     | 201     | 215     | 214     | 202     | 209     | 146     | 239     | DRB01a | 26:02  | 18:11 | 2        |    |  |  |
| C 3034                                                                  | A008   | 160     | 275     | 184     | 254     | 270     | B055    | 138     | 117     | 178     | 201     | 215     | 214     | 202     | 209     | 146     | 239     | DRB01a | 26:02  | 18:11 | 2        |    |  |  |
| C 15A                                                                   | A001   | 154     | 275     | 184     | 265     | 311     | n.d.    | 149     | 117     | 176     | 201     | 215     | 214     | 202     | 209     | 146     | 239     | DRB01a | 26:02  | 18:11 | 2        |    |  |  |
| A 2315                                                                  | A001   | 160     | 267     | 184     | 272     | 258     | B017a   | 151     | 118     | 178     | 201     | 215     | 214     | 202     | 209     | 146     | 239     | DRB01a | 26:02  | 18:11 | 2        |    |  |  |
| D 597                                                                   | A001   | 158     | 275     | 175     | 242     | 245     | B012b   | 149     | 117     | 176     | 201     | 215     | 214     | 202     | 209     | 146     | 239     | DRB01a | 26:02  | 18:11 | 10       |    |  |  |
| C 3620                                                                  | A001   | 158     | 267     | 193     | 257     | 245     | B012b   | 149     | 117     | 178     | 201     | 209     | 214     | 202     | 209     | 146     | 239     | DRB01a | 26:02  | 18:11 | 2        |    |  |  |
| B EAW                                                                   | A002a  | 156     | 271     | 178     | 246     | 245     | B043a   | 144     | 118     | 193     | 203     | 199     | 214     | 202     | 209     | 146     | 239     | DRB01a | 26:02  | 18:11 | 10       |    |  |  |
| C 426                                                                   | A004   | 158     | 271     | 184     | 261     | 284     | B048    | 138     | 122     | 193     | 203     | 199     | 214     | 202     | 209     | 146     | 239     | DRB01a | 26:02  | 18:11 | 7        |    |  |  |
| D 2838                                                                  | A224a  | 160     | 267     | 187     | 258     | 307     | B045a   | 134     | 121     | 189     | 199     | 200     | 214     | 209     | 209     | 146     | 239     | DRB01a | 26:02  | 18:11 | 4        |    |  |  |
| A 3026                                                                  | A224a  | 160     | 267     | 187     | 258     | 307     | B045a   | 134     | 121     | 189     | 199     | 200     | 214     | 209     | 209     | 146     | 239     | DRB01a | 26:02  | 18:11 | 4        |    |  |  |
| D 1402                                                                  | AlND   | 158     | 271     | 187     | 172     | 279     | B024a   | 144     | 118     | 177     | 201     | 207     | 213     | 211     | 195     | 144     | 239     | DRB02c | 01:06  | 06:06 | 2*       |    |  |  |
| D 1472                                                                  | A026   | 160     | 267     | 196     | 257     | 249     | B012b   | 156     | 122     | 172     | 201     | 217     | 213     | 209     | 201     | 146     | 239     | DRB02c | 24:01  | 18:02 | 5        |    |  |  |
| A 2777                                                                  | A026   | 156     | 271     | 178     | 272     | 286     | B001a   | 138     | 121     | 193     | 201     | 217     | 211     | 202     | null    | null    | 239     | DRB02c | 24:01  | 18:02 | 10       |    |  |  |
| D 2849                                                                  | A026   | 156     | 271     | 178     | 269     | 282     | B001a   | 138     | 121     | 193     | 201     | null    | null    | 211     | 202     | null    | 239     | DRB02c | 24:01  | 18:02 | 3        |    |  |  |
| B 2957                                                                  | A026   | 158     | 277     | 190     | 272     | 270     | B001a   | 138     | 122     | 189     | 203     | 199     | 211     | 202     | null    | null    | 239     | DRB02c | 24:01  | 18:02 | 9        |    |  |  |
| C 3228                                                                  | A026   | 156     | 271     | 178     | 246     | 245     | B012b/c | 149     | 117     | 185     | 201     | 217     | 211     | 202     | null    | null    | 239     | DRB02c | 24:01  | 18:02 | 2        |    |  |  |
| A 2775                                                                  | A019   | 156     | 277     | 187     | 272     | 274     | B028    | 140     | 117     | 176     | 191     | 199     | 213     | 215     | null    | null    | 239     | DRB02c | 24:01  | 18:02 | 2        |    |  |  |
| C/D 8933                                                                | A006   | 162     | 267     | 181     | 252     | 303     | B001a   | 138     | 122     | 172     | 203     | 218     | 213     | null    | null    | 132     | 251     | DRB03a | 26:01  | 18:01 | 5        |    |  |  |
| B 1435                                                                  | A008   | 167     | 277     | 181     | 252     | 303     | B001a   | 138     | 122     | 172     | 203     | 218     | 213     | null    | null    | 132     | 251     | DRB03a | 26:01  | 18:01 | 1        |    |  |  |
| C 3029                                                                  | A026   | 156     | 275     | 187     | 257     | 303     | B001a   | 126     | 122     | 172     | 203     | 218     | 213     | null    | null    | 132     | 251     | DRB03a | 26:01  | 18:01 | 3        |    |  |  |
| A 4043                                                                  | A004   | 158     | 275     | 175     | 248     | 245     | B012c   | 150     | 117     | 172     | 203     | 215     | 213     | null    | null    | 132     | 251     | DRB03a | 26:01  | 18:01 | 4        |    |  |  |
| B 4032                                                                  | A004   | 158     | 275     | 175     | 246     | 245     | B012c   | 150     | 117     | 172     | 203     | 215     | 213     | null    | null    | 132     | 251     | DRB03a | 26:01  | 18:01 | 4        |    |  |  |
| A 1435                                                                  | A001   | 154     | 275     | 184     | 257     | 292     | B048    | 138     | 122     | 172     | 203     | 215     | 213     | null    | null    | 132     | 251     | DRB03a | 26:01  | 18:01 | 14       |    |  |  |
| A HQ                                                                    | A004   | 154     | 275     | 184     | 257     | 292     | B048    | 138     | 122     | 172     | 203     | 215     | 213     | null    | null    | 132     | 251     | DRB03a | 26:01  | 18:01 | 3        |    |  |  |
| n.d.                                                                    | A001   | 154     | 275     | 184     | 257     | 292     | n.d.    | 138     | 121     | 172     | 203     | 215     | 213     | null    | null    | 132     | 251     | DRB03a | 26:01  | 18:01 | 2        |    |  |  |
| C 3761                                                                  | A012   | 162     | 267     | 181     | 246     | 282     | B001a   | 138     | 122     | 172     | 203     | 215     | 213     | null    | null    | 132     | 251     | DRB03a | 26:01  | 18:01 | 2        |    |  |  |
| D 2372                                                                  | A001   | 158     | 275     | 187     | 253     | 278     | B047a   | 126     | 121     | 172     | 203     | 215     | 213     | null    | null    | 132     | 251     | DRB03a | 26:01  | 18:01 | 2        |    |  |  |
| D 2407                                                                  | A008   | 154     | 269     | 184     | 257     | 282     | B001a   | 151     | 121     | 161     | 203     | 215     | 213     | null    | null    | 132     | 251     | DRB03a | 26:01  | 18:01 | 8        |    |  |  |
| D 2985                                                                  | A004   | 158     | 267     | 175     | 314     | 262     | B015a   | 149     | 122     | 191     | 203     | 215     | 213     | null    | null    | 132     | 251     | DRB03a | 26:01  | 18:01 | 2        |    |  |  |
| D 3199                                                                  | A007   | 156     | 267     | 172     | 334     | 278     | B048    | 140     | 122     | 182     | 203     | 215     | 213     | null    | null    | 132     | 251     | DRB03a | 26:01  | 18:01 | 2        |    |  |  |
| C 3633                                                                  | A008   | 154     | 269     | 184     | 257     | 282     | B001a   | 151     | 121     | 161     | 203     | 215     | 213     | null    | null    | 146     | 251     | DRB03a | 26:01  | 18:01 | 4        |    |  |  |
| C 3837                                                                  | A001   | 154     | 275     | 184     | 261     | 270     | B001a   | 138     | 121     | 183     | 203     | 199     | 213     | null    | null    | 132     | 251     | DRB03a | 26:01  | 18:01 | 2        |    |  |  |
| D 0668                                                                  | A004   | 158     | 267     | 184     | 268     | 286     | B001a   | 138     | 117     | 178     | 203     | 199     | 213     | null    | null    | 132     | 251     | DRB03a | 26:01  | 18:01 | 4        |    |  |  |
| B 2708                                                                  | A019   | 167     | 275     | 184     | 280     | 290     | B055    | 149     | 117     | 193     | 201     | 215     | 213     | 209     | 185     | 146     | 251     | DRB03a | 26:01  | 18:01 | 2        |    |  |  |
| A 2877                                                                  | A019   | 167     | 275     | 184     | 284     | 290     | B055    | 149     | 117     | 193     | 201     | 215     | 213     | 209     | 185     | 146     | 251     | DRB03a | 26:01  | 18:01 | 3        |    |  |  |
| D/C 9056                                                                | A008   | 167     | 269     | 193     | 246     | 262     | B045a   | 134     | 122     | 193     | 201     | 215     | 213     | 209     | 185     | 146     | 251     | DRB03a | 26:01  | 18:01 | 4        |    |  |  |
| D 5059                                                                  | A004   | 156     | 271     | 178     | 246     | 245     | B012b   | 149     | 122     | 191     | 199     | 200     | 213     | 209     | 185     | 146     | 251     | DRB03a | 26:01  | 18:01 | 1        |    |  |  |
| D Yusa                                                                  | A004   | 167     | 275     | 184     | 253     | 274     | B017a   | 149     | 122     | 191     | 203     | 199     | 213     | 209     | 185     | 146     | 251     | DRB03a | 26:01  | 18:01 | 17       |    |  |  |
| C 3760                                                                  | A011   | 154     | 275     | 184     | 250     | 270     | B017a   | 153     | 122     | 172     | 203     | 215     | 213     | null    | 185     | 132     | 251     | DRB03a | 26:01  | 18:01 | 2        |    |  |  |
| C 2503                                                                  | A008   | 154     | 275     | 184     | 257     | 286     | B015a   | 149     | 117     | 178     | 203     | 199     | 213     | 198     | 207     | 132     | 251     | DRB03a | 26:01  | 18:01 | 3        |    |  |  |
| C 3739                                                                  | A008   | 167     | 275     | 187     | 253     | 270     | B015a   | 159     | 117     | 189     | 203     | 199     | 213     | 198     | 207     | 132     | 251     | DRB03a | 26:01  | 18:01 | 4        |    |  |  |
| A 381                                                                   | A008   | 167     | 277     | 193     | 234     | 274     | B017a   | 136     | 118     | 191     | 199     | null    | 213     | 209     | null    | 132     | 251     | DRB03a | 26:01  | 18:01 | 6        |    |  |  |
| D 3617                                                                  | A008   | 167     | 275     | 184     | 259     | 270     | B048    | 140     | 122     | 161     | 203     | 200     | 216     | 211     | null    | 132     | 251     | DRB03a | 26:01  | 18:01 | 4        |    |  |  |
| C 2829                                                                  | A004   | 158     | 267     | 193     | 252     | 258     | B045a   | 136     | 121     | 172     | 191     | 200     | 213     | 215     | null    | null    | 251     | DRB03b | 26:01  | 18:01 | 2        |    |  |  |
| A 4032                                                                  | A008   | 167     | 267     | 184     | 249     | 258     | B017a   | 136     | 121     | 172     | 203     | 199     | 213     | 215     | null    | null    | 251     | DRB03b | 26:01  | 18:01 | 4        |    |  |  |
| C 2836                                                                  | A023   | 154     | 281     | 187     | 261     | 290     | B066    | 153     | 121     | 193     | 203     | 199     | 213     | 209     | 185     | 146     | 251     | DRB03b | 26:01  | 18:01 | 2        |    |  |  |
| L 61                                                                    | A012   | 162     | 267     | 181     | 246     | 257     | 286     | B043a   | 144     | 118     | 177     | 201     | 207     | 213     | 211     | 195     | 144     | 239    | DRB03c | 01:06 | 06:06    | 2* |  |  |
| D 2784                                                                  | A026a  | 156     | 271     | 178     | 251     | 245     | B047a   | 126     | 117     | 177     | 203     | 207     | 213     | 211     | 195     | 144     | 239     | DRB03c | 01:06  | 06:06 | 2        |    |  |  |
| C 2803                                                                  | AlND   | 154     | 275     | 190     | 242     | 278     | n.d.    | 146     | 118     | 178     | 201     | 213     | 205     | 211     | null    | 132     | 251     | DRB01a | 24:01  | 18:02 | 2        |    |  |  |
| D 2559                                                                  | A001   | 162     | 279     | 193     | 238     | 270     | B017a   | 136     | 121     | 191     | 191     | 200     | 213     | 215     | 207     | 146     | 243     | DRB03d | 01:02  | 10:05 | 2        |    |  |  |
| A 2857                                                                  | A008   | 167     | 267     | 181     | 246     | 282     | B047a   | 149     | 118     | 172     | 203     | 199     | 216     | 211     | null    | 132     | 251     | DRB03e | 26:01  | 18:01 | 17       |    |  |  |
| A/B 8922                                                                | A026   | 160     | 267     | 196     | 246     | 282     | B047a   | 149     | 118     | 172     | 203     | 199     | 216     | 211     | null    | 132     | 251     | DRB03e | 26:01  | 18:01 | 2        |    |  |  |
| A/B 8211.1                                                              | A023   | 150     | 257     | 196     | 246     | 278     | B012b/c | 149     | 117     | 178     | 203     | 199     | 216     | 211     | null    | 132     | 251     | DRB03e | 01:02  | 10:05 | 4        |    |  |  |
| C 2419                                                                  | A023   | 154     | 275     |         |         |         |         |         |         |         |         |         |         |         |         |         |         |        |        |       |          |    |  |  |
