# Supplementary material for: Differential recombination dynamics within the MHC of macaque species
Source: PubMed Central journal article supplement (PMC4156779; doi:10.1007/s00251-014-0783-4), 2014-06-17
Supplement: 251_2014_783_MOESM4_ESM.pdf [file 251_2014_783_MOESM4_ESM.pdf]

Supplementary Table 4. MHC founder haplotypes of cynomolgus macaques

| Hapl      | Mamu-A | D6S2704 | D6S2702 | D6S2797 | D6S2950 | D6S2691 | Mamu-B | D6S2809 | D6S1615 | D6S2670 | D6S2742 | D6S2893 | D6S2892 | D6S2734 | D6S2890 | D6S2888 | D6S2804 | DRB    | DQA1*    | DQB1*    | # hapl |
|-----------|--------|---------|---------|---------|---------|---------|--------|---------|---------|---------|---------|---------|---------|---------|---------|---------|---------|--------|----------|----------|--------|
| 1         | A001   | 160     | 271     | 196     | 253     | 252     | B044c  | 139     | 118     | 176     | 201     | 205     | 211     | null    | 194     | 150     | 251     | DRB21  | 05:04    | 17:05    | 2      |
| 2         | A003   | 151     | 275     | 193     | 277     | 257     | B044b  | 140     | 118     | 180     | 203     | 204     | 216     | 202     | 205     | 132     | 239     | DRB13  | 24:02:03 | 18:08    | 2      |
| 3         | A007   | 160     | 265     | 184     | 260     | 266     | B002b  | 149     | 119     | 195     | 201     | 200     | 214     | 198     | null    | 132     | 251     | DRB04  | 23:01    | 18:04    | 2      |
| 3.1       | A007   | 160     | 265     | 184     | 260     | 270     | B002b  | 149     | 119     | 195     | 201     | 200     | 214     | 198     | null    | 132     | 251     | DRB04  | 23:01    | 18:04    | 1      |
| 3.1/26    | A069   | 153     | 279     | 184     | 253     | 270     | B002b  | 149     | 119     | 195     | 201     | 200     | 214     | 198     | null    | 132     | 251     | DRB04  | 23:01    | 18:04    | 4      |
| 5         | A010a  | 160     | 279     | 190     | 261     | 329     | B033   | 142     | 118     | 191     | 201     | 206     | 213     | 202     | 197     | 179     | 251     | DRB03b | 01:14    | 06:23    | 4      |
| 6         | A010b  | 153     | 267     | 181     | 257     | 298     | B103   | 136     | 119     | 176     | 201     | 201     | 213     | 202     | 188     | 146     | 243     | DRB02  | 05:07    | 17:06:02 | 6      |
| 7         | A018a  | null    | 271     | 175     | 261     | 334     | B002a  | 140     | 121     | 201     | 201     | 199     | 216     | 207     | 203     | 153     | 239     | DRB14  | 01:03:01 | 06:15    | 11     |
| 8         | A018   | 160     | 265     | 178     | 264     | 269     | B090   | 149     | 118     | 170     | 201     | 211     | 210     | null    | 191     | 161     | 243     | DRB19a | 01:07    | 06:08    | 6      |
| 9         | A018b  | 156     | 275     | 184     | 256     | 314     | B137   | 151     | 121     | 175     | 201     | 199     | 214     | 198     | null    | 132     | 251     | DRB04  | 23:01    | 18:04    | 7      |
| 10        | A031a  | 149     | 271     | 181     | 249     | 293     | B051   | 142     | 118     | 186     | 201     | 206     | 211     | 202     | 205     | 142     | 251     | DRB11  | 26:01:02 | nd       | 6      |
| 11        | A031b  | 149     | 277     | 178     | 269     | 270     | B027b  | 128     | 118     | 189     | 201     | 212     | 210     | null    | 192     | 161     | 243     | DRB19a | 01:07    | 06:08    | 3      |
| A/B Clint | A063a  | 166     | 271     | 187     | null    | 276     | B046a  | 136     | 123     | 193     | 201     | 215     | 216     | null    | 205     | 142     | 243     | DRB19a | 01:07    | 06:08    | 2      |
| 11/19     | A031b  | 149     | 277     | 178     | 269     | 270     | B027b  | 128     | 118     | 189     | 201     | 215     | 216     | null    | 205     | 142     | 239     | DRB15  | 24:03    | 18:01:01 | 1      |
| 12        | A031a  | 149     | 275     | 188     | 245     | 300     | B027a  | 142     | 121     | 172     | 201     | 204     | 220     | 202     | 199     | 149     | 249     | DRB16  | 23:01    | 18:04    | 6      |
| 13        | A040   | null    | 263     | 184     | 248     | 237     | B069b  | 151     | 118     | 175     | 201     | 202     | 213     | 202     | null    | 132     | 251     | DRB06  | 01:13    | 06:17    | 6      |
| 14        | A058   | 166     | 281     | 187     | 253     | 275     | B007   | 149     | 121     | 197     | 201     | 196     | 213     | 202     | 202     | 161     | 243     | DRB08  | 05:02    | 17:02:01 | 11     |
| 15        | A059   | 149     | 273     | 181     | 261     | 290     | B109   | 128     | 121     | 172     | 201     | 202     | 213     | 202     | 209     | 155     | 243     | DRB22  | 05:09    | 17:04    | 15     |
| 16        | A060   | 160     | 283     | 193     | 246     | 290     | B036   | 157     | 119     | 172     | 201     | 206     | 213     | null    | 205     | 149     | 251     | DRB07  | 05:03:02 | 16:01    | 2      |
| 17        | A061   | 158     | 273     | 193     | 249     | null    | B010   | 140     | 118     | 176     | 201     | 206     | 213     | null    | 197     | 149     | 251     | DRB19b | 01:06    | 06:11    | 8      |
| 18        | A062   | 160     | 275     | 190     | 249     | 278     | B033   | 153     | 118     | 172     | 201     | 212     | 214     | 202     | null    | 132     | 239     | DRB09  | 05:03:01 | 16:01    | 2      |
| 19        | A063a  | 166     | 271     | 187     | null    | 276     | B046a  | 136     | 123     | 193     | 201     | 215     | 216     | null    | 205     | 142     | 239     | DRB15  | 24:03    | 18:01:01 | 8      |
| 20        | A063b  | 147     | 275     | 196     | 260     | 311     | B011   | 142     | 121     | 172     | 201     | 200     | 214     | 202     | null    | 132     | 239     | DRB09  | 05:03:01 | 16:01    | 5      |
| 21        | A064   | 156     | 265     | 178     | 264     | 349     | B025   | 153     | 121     | 189     | 201     | 206     | 211     | 200     | null    | 149     | null    | DRB20  | 01:06    | 06:11    | 19     |
| 21/26     | A064   | 156     | 265     | 184     | 253     | 320     | B044a  | 144     | 120     | 178     | 201     | 196     | 208     | 202     | 192     | 179     | 239     | DRB17  | 24:06    | 18:06    | 2      |
| 23        | A065   | 162     | 279     | 190     | null    | 298     | B021   | 155     | 122     | 172     | 201     | 211     | 216     | 202     | 205     | 142     | 239     | DRB15  | 24:03    | 18:01:01 | 5      |
| 24        | A066   | 156     | 281     | 185     | 277     | 252     | B046c  | 153     | 121     | 171     | 201     | 198     | 213     | 209     | null    | null    | 239     | DRB10  | 23:01    | 18:04    | 17     |
| 25        | A068   | 151     | 263     | 190     | 253     | 361     | B046b  | 136     | 122     | 172     | 201     | 199     | 214     | 204     | null    | 132     | 239     | DRB18  | 01:02    | 06:07:01 | 8      |
| 26        | A069   | 153     | 279     | 184     | 253     | 320     | B044a  | 144     | 120     | 178     | 201     | 196     | 208     | 202     | 192     | 179     | 239     | DRB17  | 24:06    | 18:06    | 3      |
| 27        | A070   | 158     | 279     | 181     | 272     | 289     | B048   | 138     | 122     | 172     | 201     | 208     | 216     | 202     | 201     | 148     | 243     | DRB05  | 05:03:02 | 16:01    | 6      |
| 28        | A071a  | 156     | 277     | 193     | 253     | 267     | B013   | 144     | 121     | 170     | 201     | 200     | 213     | 185     | 211     | 142     | 251     | DRB09  | 05:08    | 17:02:02 | 9      |
| C/D Toga  | A071a  | 156     | 277     | 193     | 253     | 267     | B013   | 144     | 121     | 170     | 201     | 200     | 213     | 209     | null    | null    | 239     | DRB10  | 23:01    | 18:04    | 1      |
| 29        | A071b  | 166     | 265     | 184     | 253     | 351     | B104   | 136     | 119     | 176     | 201     | 196     | 208     | null    | 209     | 134     | 239     | DRB01  | 24:02:01 | 18:08    | 2*     |
| 30        | A072   | 169     | 273     | 184     | 249     | 267     | B069a  | 146     | 119     | 172     | 201     | 202     | 217     | 202     | null    | 132     | 239     | DRB12  | 05:03:01 | 16:01    | 7      |
| 31        | A092   | 147     | 271     | 181     | 286     | null    | B148   | 155     | 122     | 172     | 201     | 201     | 214     | 202     | 195     | 144     | 243     | DRB03a | 01:08:02 | 06:01:02 | 5      |
| 33^       | n.d.   | 158     | 273     | 178     | 245     | 295     | n.d.   | 153     | 120     | 172     | 201     | 196     | 219     | 202     | 185     | 146     | 231     | DRB21  | 05:04    | 17:05    | 2      |

^ not in Otting et al., 2012; \* implies that the haplotype is detected in two animals. The second haplotype of one animal, however, is observed only once and therefore not included in the dataset
